# Supplementary material for: Natural Variation in the Yeast Glucose-Signaling Network Reveals a New Role for the Mig3p Transcription Factor
Source: PubMed Central journal article supplement (PMC3516482; doi:10.1534/g3.112.004127), 2012-12-01
Supplement: supp_2.12.1607_TableS1.pdf [file supp_2.12.1607_TableS1.pdf]

**Table S1 Strains used in this study**

| Strain  | Background                   | Group  | Description                                                                       | Source          | Ploidy  |
|---------|------------------------------|--------|-----------------------------------------------------------------------------------|-----------------|---------|
| DBY8268 | S288c derivative             | Lab    | S288c derivative ( <i>ura3-52/ura3Δ-0 ho/ho GAL2/GAL2</i> )                       | David Botstein  | diploid |
| BY4741  | S288c derivative             | Lab    | S288c derivative ( <i>MATa ura3Δ-0 leu2Δ-0 met15Δ-0 his3Δ-1 ho</i> )              | Jasper Rine     | haploid |
| YKO0160 | S288c derivative             | Lab    | S288c derivative ( <i>MATa ura3Δ-0 leu2Δ-0 met15Δ-0 his3Δ-1 ho mig3Δ::KanMX</i> ) | Open Biosystems | haploid |
| YPS163  | wild strain                  | Oak    | YPS163                                                                            | Paul Sniegowski | diploid |
| AGY338  | YPS163                       | Oak    | YPS163 derivative ( <i>MATa hoΔ::HygMX</i> )                                      | this study      | haploid |
| AGY733  | YPS163                       | Oak    | YPS163 derivative ( <i>MATa hoΔ::HygMX mig3Δ::KanMX</i> )                         | this study      | haploid |
| AGY680  | BY_mig3Δ/YPS_MIG3 hemizygote | hybrid | YPS163/S288c hemizygous strain ( <i>BY_mig3Δ/YPS_MIG3</i> )                       | this study      | diploid |
| AGY734  | YPS_mig3Δ/BY_MIG3 hemizygote | hybrid | YPS163/S288c hemizygous strain ( <i>YPS_mig3Δ/BY_MIG3</i> )                       | this study      | diploid |
